# Supplementary material for: Mechanosensory neuron regeneration in adult Drosophila
Source: Oxford University Press journal article supplement (doi:10.1242/dev.187534), 2021-02-17
Supplement: dev187534supp.pdf [file dev187534supp.pdf]

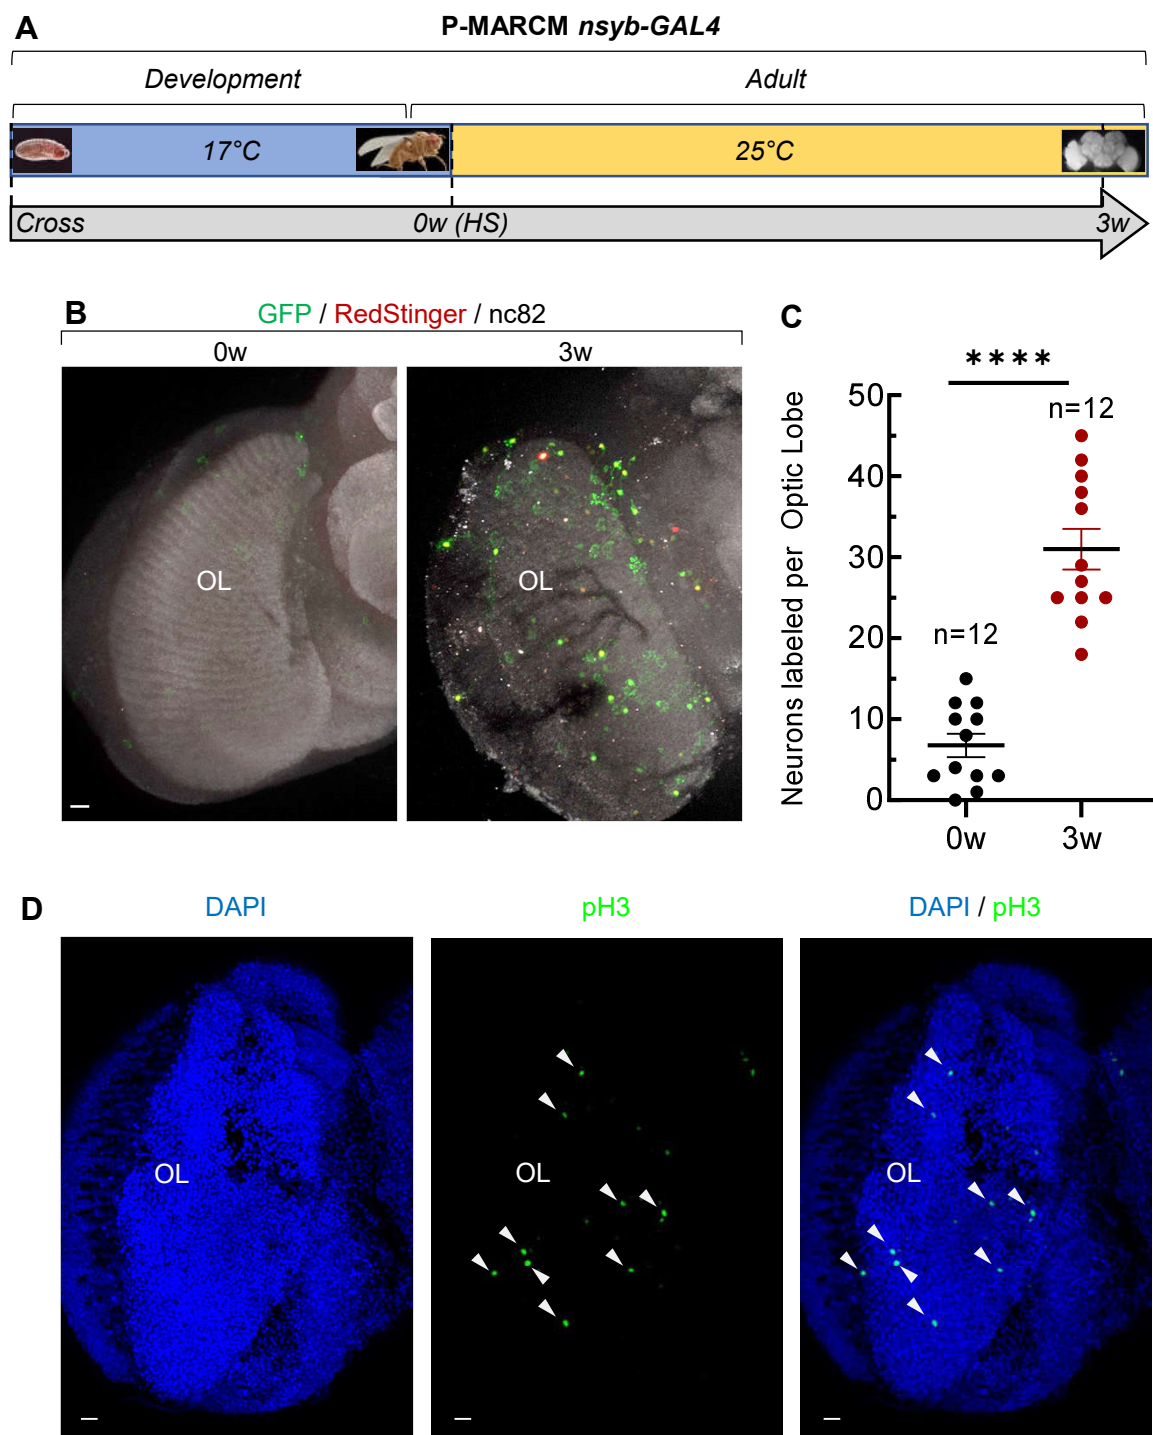

**Fig. S1. P-MARCM captures adult neurogenesis in the *Drosophila* optic lobes (OL)**

- (A) Experimental strategy to reveal adult neurogenesis with P-MARCM *nsyb-GAL4*. Flies 2-5 days-old were Heat-Shocked (HS) to activate the P-MARCM system and brains were dissected 3 weeks (3w) after.
- (B) Adult-born neurons in the optic lobes (OL) are labeled by P-MARCM with *nsyb-GAL4* line 3 weeks after HS.
- (C) Amount of adult-born neurons in OL at 3 weeks (n=12 OL) is significantly higher than background levels (n=12 OL) ( $p=0.0000002$ , Student's t-test). Error bars represent s.e.m.
- (D) Cell proliferation is also detected by anti-pH3 antibody in the OL ( $9.2 \pm 1.0$  s.e.m. pH3+ cells/OL; n=26 OL). Scale bars for all panels: 10 $\mu$ m.

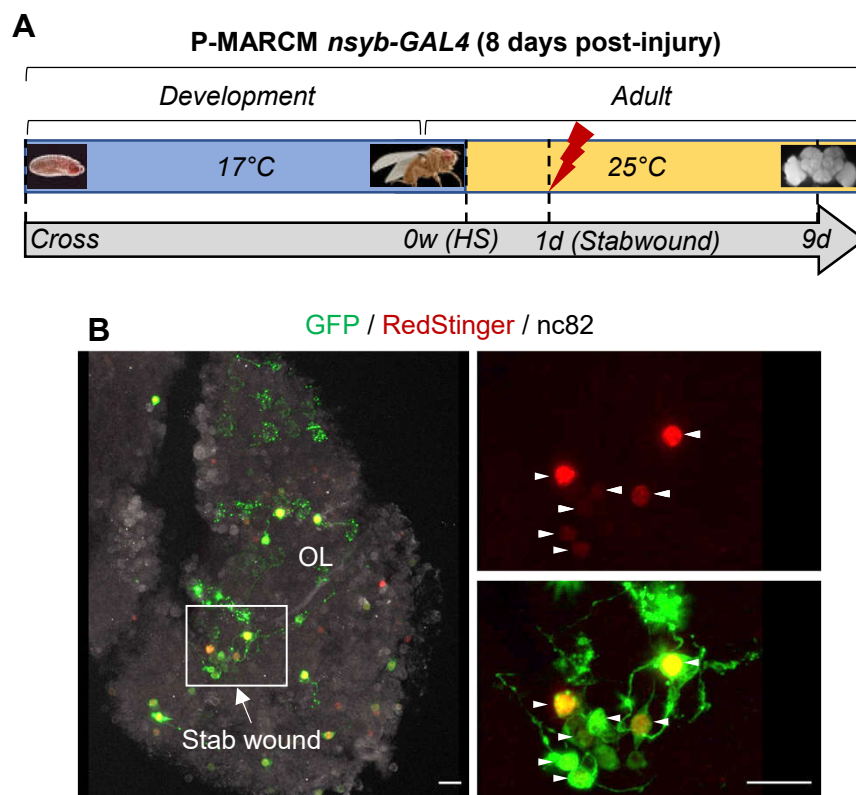

**Fig. S2. P-MARCM captures injury-induced neuronal regeneration in the *Drosophila* optic lobe (OL)**

- (A) Experimental strategy to capture injury-induced neuronal regeneration in OL with P-MARCM *nsyb-GAL4*. Two to five days-old flies were Heat-Shocked (HS) to activate the P-MARCM system. Stab wound was applied to the left OL by a fine needle 1 day after HS. Flies were dissected and imaged 8 days later.
- (B) Regenerated neurons in the OL (arrowheads) are labeled by P-MARCM with *nsyb-GAL4* line 8 days after stab wound. Scale bar: 10  $\mu$ m.

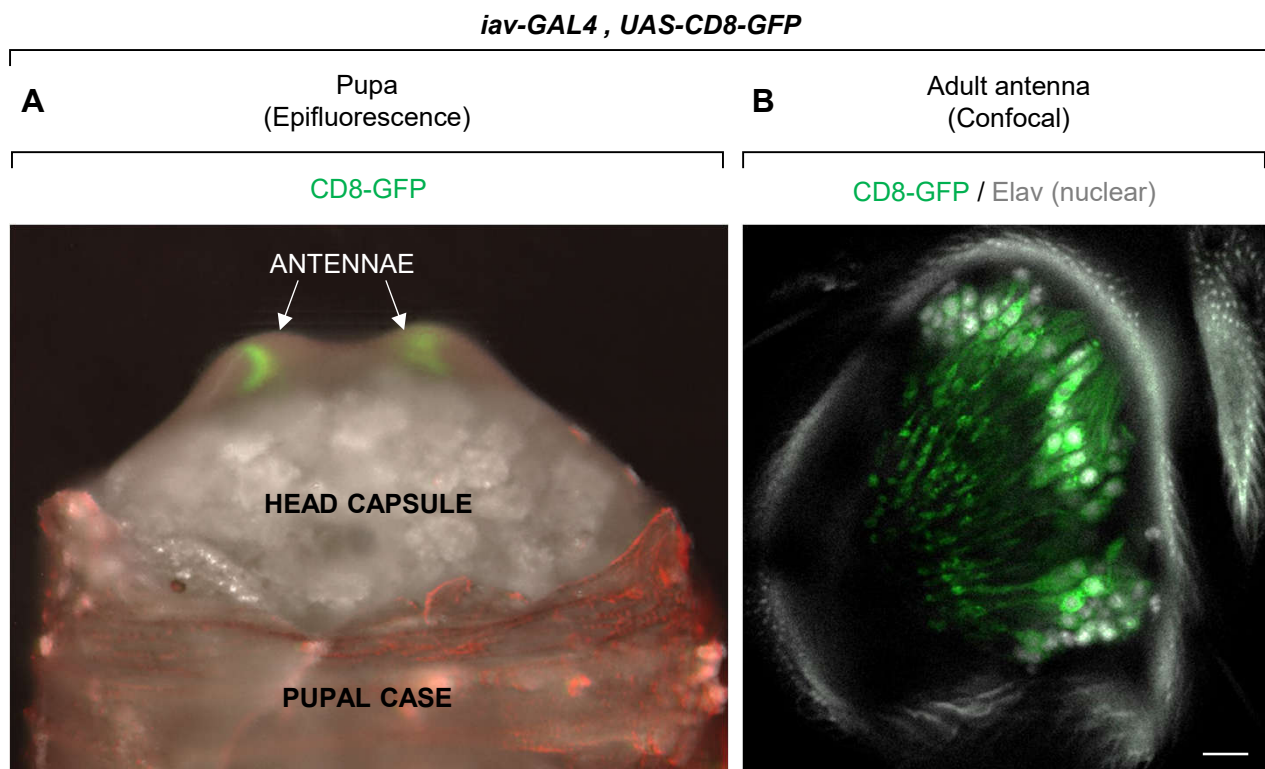

**Fig. S3. Expression pattern of *iav-GAL4* line in the antennae.**

- (A) Expression of *iav-GAL4* in the antennae begins in pupal stage.  
 (B) *iav-GAL4* expression is restricted to JO neurons in adult antenna. Scale bar: 10μm.

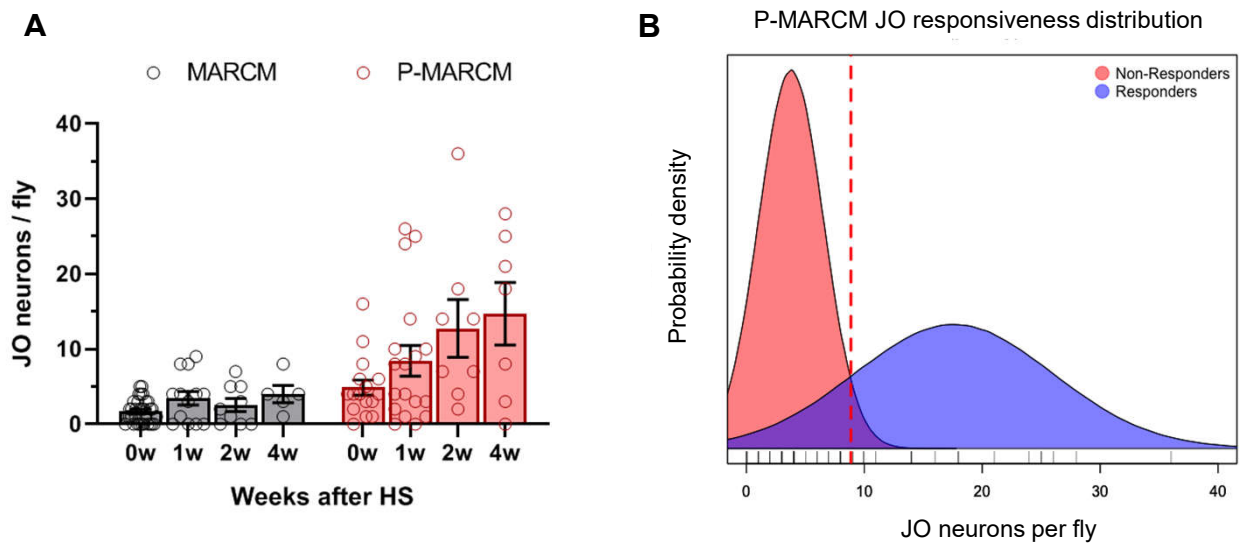

**Fig. S4. JO neurogenesis detection and distribution**

- (A) Quantification of newborn JO neurons in MARCM and P-MARCM lineage tracing approaches. JO neurogenesis increases over time upon P-MARCM labeling. Error bars represent s.e.m.
- (B) Gaussian mixture model classifies flies into “Responders” and “Non-responders” indicating the presence of adult JO neurogenesis beyond background levels.

JO-driven (*iav-GAL4*) lineage tracing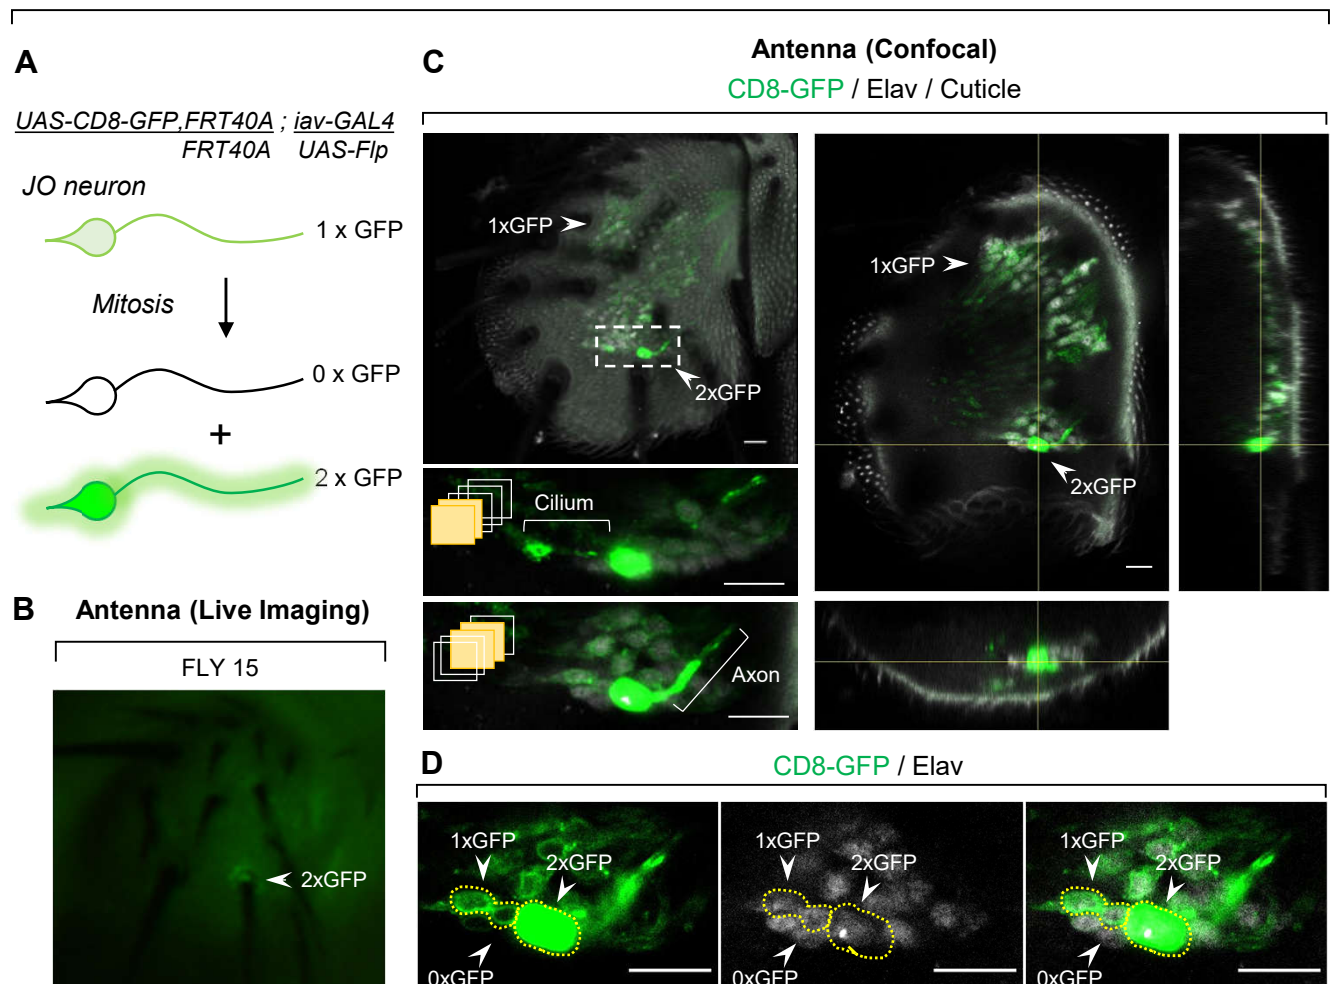

**Fig. S5. Neurogenic clones from JO neurons are captured at single-cell resolution *in vivo*.**

- (A) *iav-GAL4*-driven lineage tracing system to assess neurogenesis from JO neurons. Daughter cells express 2xGFP and 0xGFP, while non-dividing JO neurons contain 1xGFP.
- (B) A single JO neuron expressing 2xGFP detected by fluorescent microscopy on an intact, alive fly.
- (C) Confocal microscopy confirms proliferation of a single neuron on the anterior part of the antenna. Captions show maximum intensity projections of discrete planes to visualize the JO neuron cilium and axon.
- (D) Neurogenesis from JO neurons detected by twin-spots of 2xGFP/Elav+ neurons and 0xGFP/Elav+ neurons among non-dividing 1xGFP/Elav+ JO neurons. Scale bars: 10µm



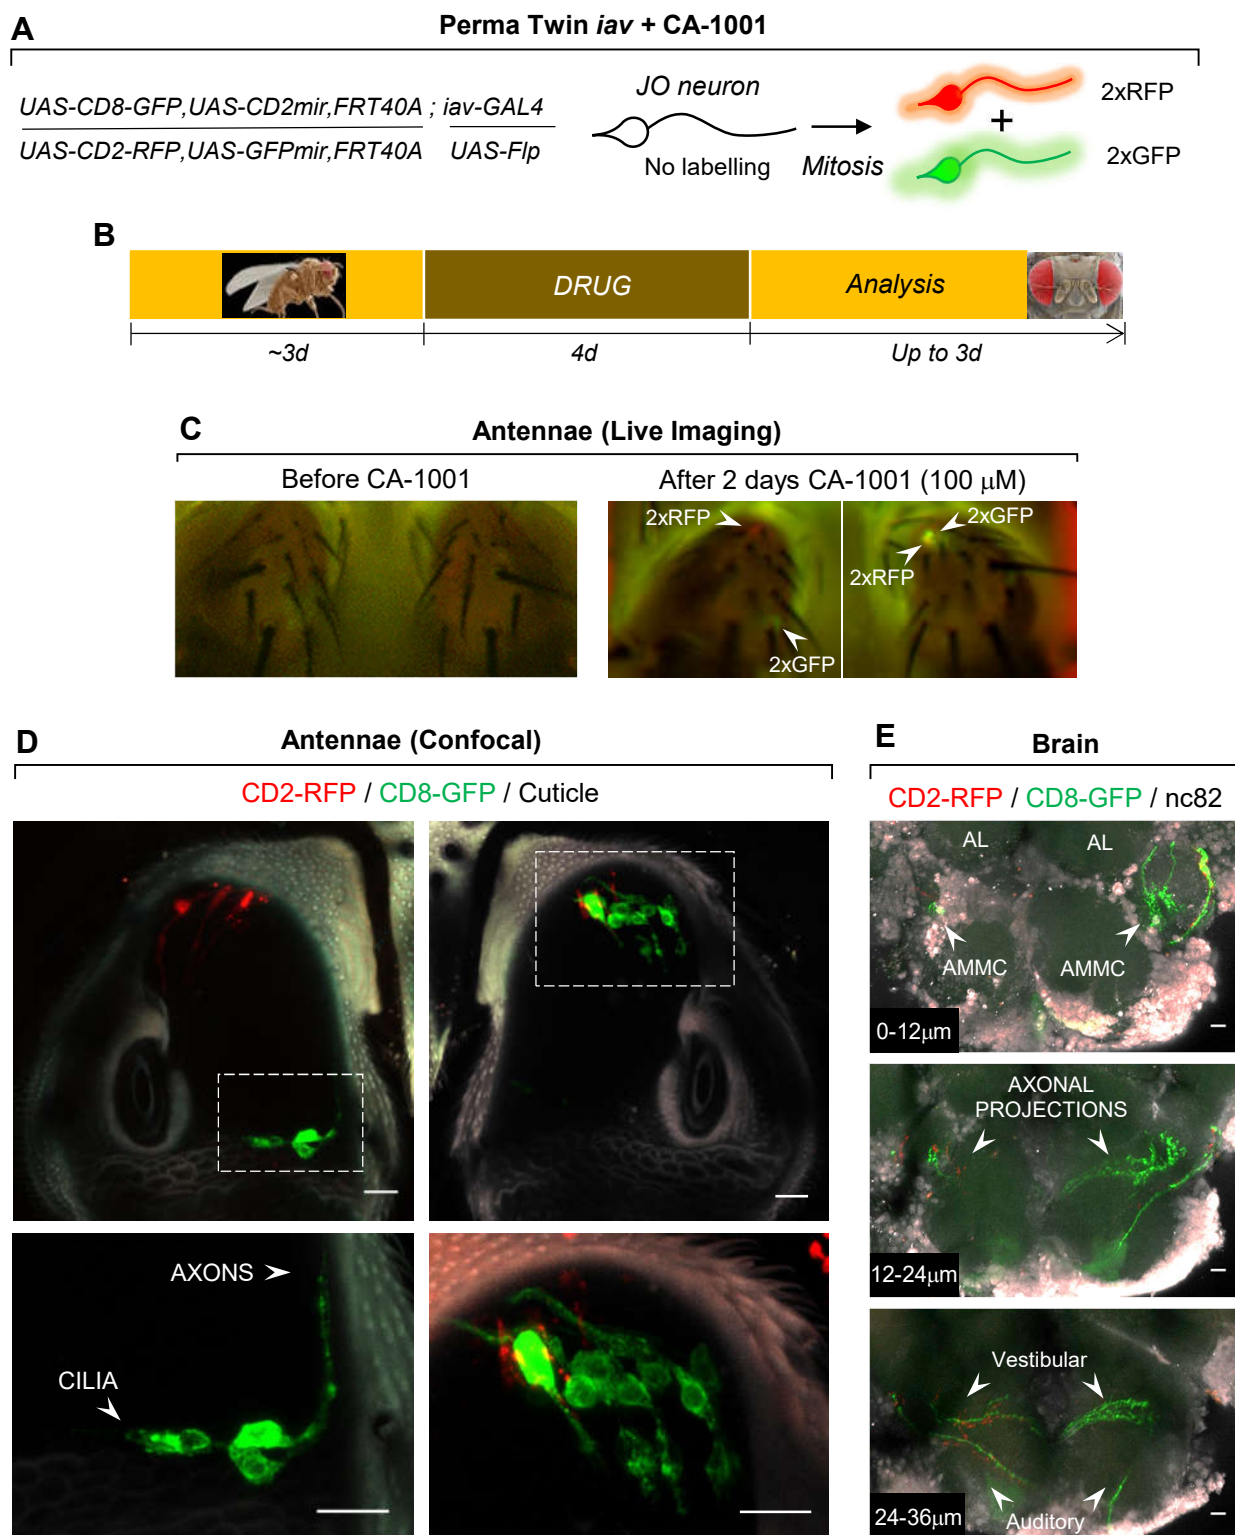

**Fig. S6. The calcium ionophore CA-1001 increases neurogenesis from JO neurons.**

- (A) Perma Twin-iav lineage tracing system to assess neurogenesis from JO neurons.
- (B) Experimental strategy to capture neurogenesis from JO neurons. Three-day old PT-iav flies receive oral drug administration for 4 days and are analyzed up to 3 days later.
- (C) New JO neurons are detected by fluorescent microscopy on intact, alive flies as soon as 2 days after administration of CA-1001 at 100 $\mu$ M.
- (D) Newly-generated JO neurons develop cilia and extend axons to the brain. AMMC: Antennal Mechanosensory and Motor Center; AL: Antennal Lobe
- (E) New JO neurons target the brain in the Auditory and Vestibular circuit pattern as early as 2 days following drug administration. Scale bars for all panels: 10 $\mu$ m.

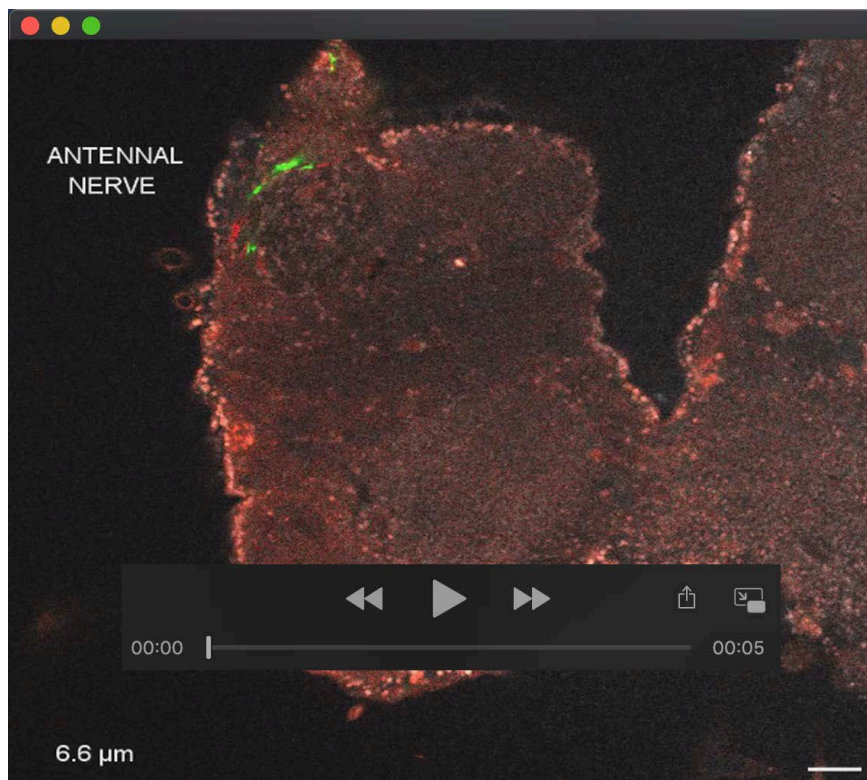

**Movie 1. Axonal projections of regenerated Johnston Organ (JO) neurons induced by CA-1001.** Annotated confocal stack of newborn auditory and vestibular JO neuron axonal projections after 2 days of CA-1001 administration to Perma Twin-iav flies. Scale bar: 10  $\mu$ m.
